# Supplementary material for: Gold nanostars as SERS-active substrates for FT-Raman spectroscopy
Source: Royal Society of Chemistry journal article supplement (doi:10.1039/c4ra13830a), 2014-12-23
Supplement: c4ra13830a1.pdf [file c4ra13830a1.pdf]

Supporting Information

**Gold nanostars as SERS-active substrates  
for FT-Raman spectroscopy**

Angela Zoppi,<sup>1,2</sup> Silvana Trigari,<sup>2</sup> Giancarlo Margheri,<sup>2</sup> Maurizio Muniz-Miranda,<sup>3</sup> \*  
and Emilia Giorgetti<sup>2</sup>

<sup>1</sup> *Department of Physics “Enrico Fermi”, University of Pisa, Pisa, Italy*

<sup>2</sup> *Institute of Complex Systems CNR, Sesto Fiorentino, Italy*

<sup>3</sup> *Department of Chemistry “Ugo Schiff”, University of Florence, Sesto Fiorentino, Italy*

\* Corresponding Author: [maurizio.muniz@unifi.it](mailto:maurizio.muniz@unifi.it)

Fig S1 – Extinction spectra recorded on fresh SF-NSs and one day after.

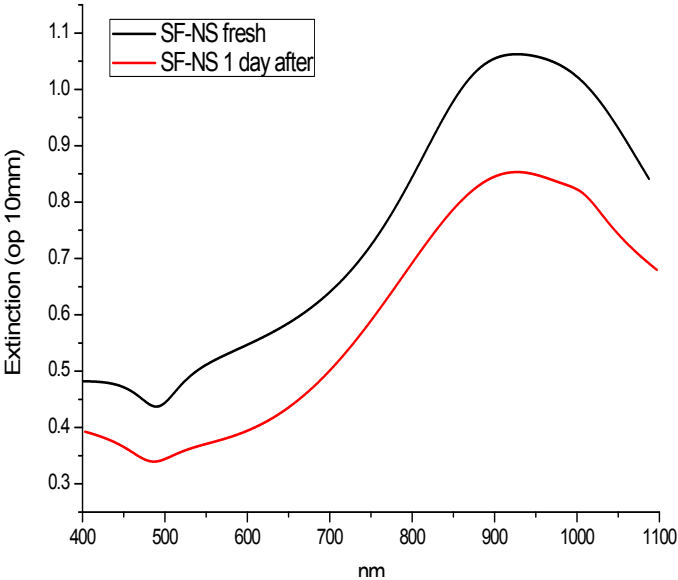

Fig S2 – Absorption spectrum of  $1.6 \times 10^{-6}$  M NF8 in H<sub>2</sub>O:EtOH 10:1 at different CTAB concentrations.

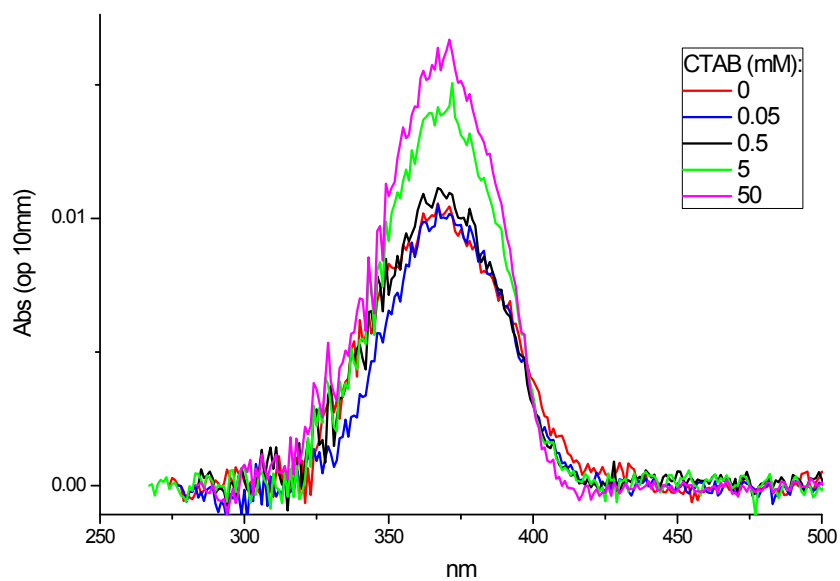

Fig S3 – Structural features of *SF-NSs* obtained by Log-normal fitting of the statistical distributions.

| <u>Core diameter</u>                                    | <u>Tip angle</u>                                | <u>Branch length</u>                                    | <u>Tip radius</u>                                    | <u>Circumscribed<br/>circumference diameter</u>          |
|---------------------------------------------------------|-------------------------------------------------|---------------------------------------------------------|------------------------------------------------------|----------------------------------------------------------|
| Peak: 39 nm<br>$\sigma^-$ : 17 nm<br>$\sigma^+$ : 29 nm | Peak: 9°<br>$\sigma^-$ : 5°<br>$\sigma^+$ : 11° | Peak: 27 nm<br>$\sigma^-$ : 10 nm<br>$\sigma^+$ : 15 nm | Peak: 3 nm<br>$\sigma^-$ : 1 nm<br>$\sigma^+$ : 1 nm | Peak: 120 nm<br>$\sigma^-$ : 28 nm<br>$\sigma^+$ : 36 nm |

Fig S4 – Structural features of *CTAB-NSs* obtained by Log-normal fitting of the statistical distributions.

| <u>Core diameter</u>                                   | <u>Tip angle</u>                                 | <u>Branch length</u>                                    | <u>Tip radius</u>                                    | <u>Circumscribed<br/>circumference diameter</u>          |
|--------------------------------------------------------|--------------------------------------------------|---------------------------------------------------------|------------------------------------------------------|----------------------------------------------------------|
| Peak: 76 nm<br>$\sigma^-$ : 9 nm<br>$\sigma^+$ : 10 nm | Peak: 23°<br>$\sigma^-$ : 7°<br>$\sigma^+$ : 10° | Peak: 53 nm<br>$\sigma^-$ : 14 nm<br>$\sigma^+$ : 20 nm | Peak: 5 nm<br>$\sigma^-$ : 1 nm<br>$\sigma^+$ : 1 nm | Peak: 179 nm<br>$\sigma^-$ : 29 nm<br>$\sigma^+$ : 34 nm |

Fig S5 – Dependence of the SERS signal of NF8 (measured as the integrated area of the band at  $1400\text{ cm}^{-1}$ ) on the NF8 concentration (log scale).

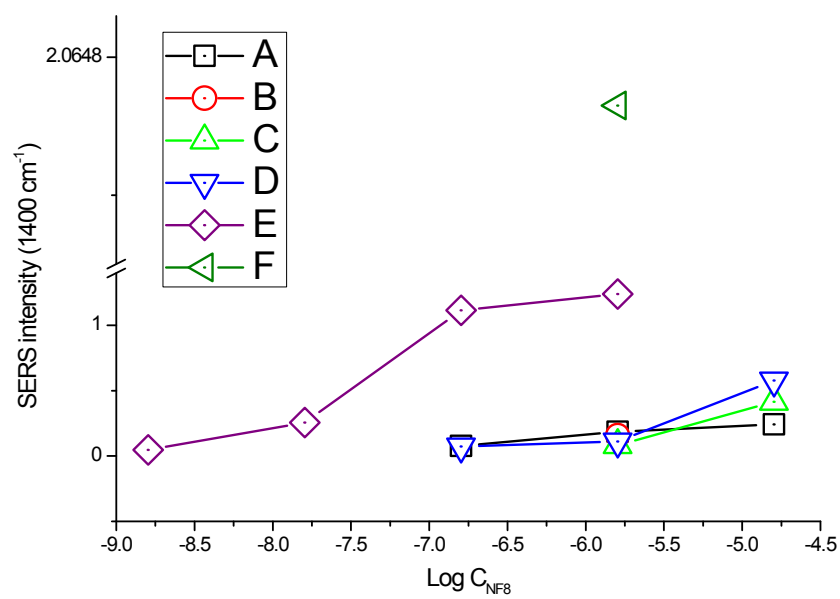

Fig S6 – UV-vis spectra of a) supernatant solutions of Au-NSs incubated with  $1.6 \times 10^{-6}$  M NF8; b) NF8 in the supernatant of **C4** sample compared with that taken from the original solution (50 mM CTAB); c) NF8 in the supernatant of **D4** sample compared with that taken from the original solution (5 mM CTAB).

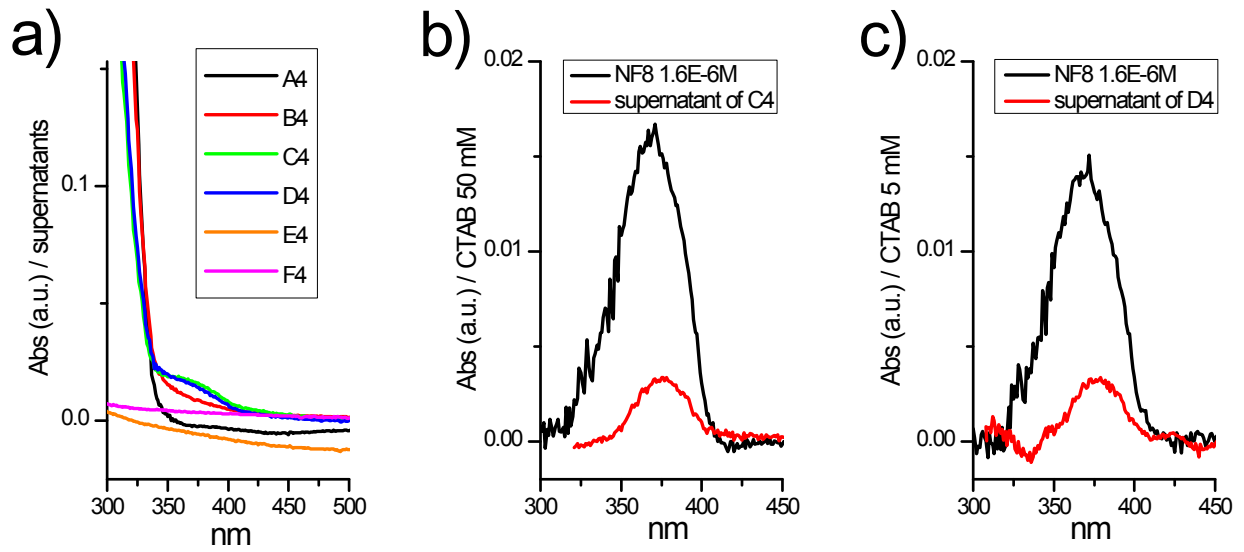

Fig S7 – Model structures of *SF-NSs* and *CTAB-NSs* and morphological data.

|                                              |                                           | <i>SF-NSs</i> (54 tips)                                                           | <i>CTAB-NSs</i> (26 tips)                                                           |
|----------------------------------------------|-------------------------------------------|-----------------------------------------------------------------------------------|-------------------------------------------------------------------------------------|
| Portion<br>( 1/8 ) of the modelled structure |                                           | 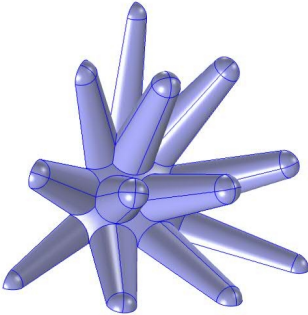 |  |
| Single nanostar                              | tips surface (nm <sup>2</sup> )           | 2789                                                                              | 3250                                                                                |
|                                              | total surface (nm <sup>2</sup> )          | 37490                                                                             | 83278                                                                               |
|                                              | volume (nm <sup>3</sup> )                 | 629900                                                                            | 101480                                                                              |
| NSs density: nanoparticles/ml                |                                           | $1.7 \times 10^{10}$                                                              | $2.4 \times 10^9$                                                                   |
| 1 ml of solution                             | tips surface (nm <sup>2</sup> )           | $4.7 \times 10^{13}$                                                              | $7.8 \times 10^{12}$                                                                |
|                                              | total metallic surface (nm <sup>2</sup> ) | $6.4 \times 10^{14}$                                                              | $2.4 \times 10^{14}$                                                                |
